# Supplementary material for: Essential role of the Crk family-dosage in DiGeorge-like anomaly and metabolic homeostasis
Source: Life Sci Alliance. 2020 Feb 10;3(2):e201900635. doi: 10.26508/lsa.201900635 (PMC7010317; doi:10.26508/lsa.201900635)
Supplement: Supplementary file 5 [file LSA-2019-00635_Supplemental_Data_3.xlsx]

## Sheet: Anion
		Welch's T-test (n = 3)				log2(FC)
		Crk +4OHT vs uninduced	Crk/Crkl +4OHT vs uninduced	Crkl +4OHT vs uninduced		Crk +4OHT vs uninduced	Crk/Crkl +4OHT vs uninduced	Crkl +4OHT vs uninduced
F008	F1,6P	0.00590075	0.00789334	0.00493599		-0.689639	-2.39067	-0.948484
G003	G6P	0.0190933	0.00173048	0.0245171		-1.26613	-1.69118	-0.721116
L005	Lactate	0.000678945	2.22474e-05	0.00592633		-1.15951	-1.53523	-0.769474
P028	3PG	0.610449	0.00245226	0.00221893		-0.168861	-1.40884	-0.655886
U008	UMP	0.394223	0.040408	0.0323793		-0.225462	-1.40041	-1.04604
F001	F6P	0.430191	0.0031996	0.107051		-0.275354	-1.27644	-0.241187
H196	2-Hydroxyglutarate	0.427907	0.0275104	0.0192815		0.193268	-1.11361	-0.476562
M002	Malate	0.00835324	0.00622998	0.0283439		-0.652562	-0.997288	-0.644497
S004	Succinate	0.00139785	0.0152318	0.0058448		-0.654938	-0.929619	-0.537668
G020	G1P	0.0538703	0.0395345	0.146639		-0.489586	-0.863543	-0.593411
O002	2-Oxoglutarate	0.918938	0.0115833	0.0225412		0.0239573	-0.843424	-0.606646
F005	Fumarate	0.00982846	0.00315601	0.0444861		-0.530702	-0.833348	-0.351328
P073	5-Oxoproline	0.887514	0.0021061	0.0436419		0.0395978	-0.754489	-0.388905
I001	Isocitrate	0.266	0.0344597	0.0893396		-0.339172	-0.746544	-0.436378
C016	trans-Cinnamate	0.0116079	0.000731775	0.0656934		-0.192069	-0.726893	-0.282036
G030	Glycerophosphate	0.675061	0.00919971	0.0139819		-0.0445898	-0.71203	-0.452797
M009	threo-beta-methylaspartate	0.512097	0.0472424	0.235209		-0.237914	-0.682033	-0.424312
P060	O-Phosphoserine	0.0160808	0.0134653	0.00369069		-0.34939	-0.680589	-0.695143
P032	Pantothenate	0.00284739	0.0943781	0.142513		1.00269	-0.574411	-0.416914
C005	Citrate	0.115251	0.0203225	0.197941		0.0670136	-0.458259	-0.175747
A008	AMP	0.0168248	0.154183	0.94685		0.665207	-0.313254	0.00316988
A030	cis-Aconitate	0.0275643	0.143327	0.412866		-0.215953	-0.308692	-0.116318
I005	IDP	0.0148979	0.126981	0.0789631		0.980692	-0.250514	-0.47168
A023	ADP	0.00172887	0.209395	0.0586934		1.08566	-0.241022	-0.259036
A142	N-Acetylaspartate	0.026071	0.391314	0.228823		0.626678	-0.149971	0.228373
U007	UDP	0.0153167	0.667925	0.586269		1.29144	-0.120044	0.0670137
U009	UTP	0.000430802	0.514485	0.640559		0.963272	-0.109091	-0.0717129
U001	UDP-glucose	0.0121848	0.425555	0.138823		0.888068	-0.0981266	-0.185211
U003	UDP-N-acetylglucosamine	0.0156577	0.942997	0.0498876		1.02455	0.00652124	0.223916
C020	CMP-N-acetylneuraminate	0.0208658	0.965226	0.601196		0.678105	0.0133804	-0.158631
A009	ATP	0.0315748	0.803329	0.726792		1.86383	0.0414529	0.0505109
C010	CTP	0.0349765	0.284046	0.630149		1.55951	0.241313	0.0794623
G016	GMP	0.0216452	0.344342	0.96895		0.847691	0.297955	0.0520718
I006	ITP	0.00718417	0.222298	0.272648		1.2652	0.405855	0.359955
U002	UDP-glucuronate	0.00239637	0.437655	0.332561		2.27978	0.445605	0.337386
E009	Ethanolamine phosphate	0.311172	0.0113028	0.106847		-0.0921094	0.579471	0.393982
G017	GTP	0.0286612	0.0583708	0.0374885		2.02317	0.978468	0.838762

## Sheet: Cation
		Welch's T-test (n = 3)				log2(FC)
		Crk +4OHT vs uninduced	Crk/Crkl +4OHT vs uninduced	Crkl +4OHT vs uninduced		Crk +4OHT vs uninduced	Crk/Crkl +4OHT vs uninduced	Crkl +4OHT vs uninduced
D067	5-Methylthioadenosine	0.00115496	0.0451848	0.000713099		-1.20009	-2.08275	-1.3667
D015	Dihydrouracil	4.91305e-05	6.08043e-05	0.0441397		-1.52493	-1.6355	-1.88605
C224	Cysteine-glutathione disulphide -Divalent	0.200399	0.0153851	0.0409554		0.574127	-1.4515	-2.44197
T004	Taurine	0.000687148	0.000122053	0.0673375		-1.1574	-1.21297	-1.00352
L031	alpha-Lipoamide	0.00128489	0.00508662	0.0157338		-0.826709	-1.21189	-1.17584
D055	2'-Deoxycytidine	0.0924853	0.00868224	0.905087		-1.06516	-1.17853	-0.0299348
U005	Urea	0.00832796	0.0020612	0.00234759		-0.711852	-1.15627	-0.841964
D033	Diethanolamine	0.302409	0.00181055	0.349435		-0.567027	-1.138	-0.576519
C034	Creatinine	0.0159243	0.0335296	0.0382062		-0.548052	-1.0664	-0.50178
P074	Phosphorylcholine	0.0151741	0.0078808	0.0225354		-0.171768	-1.06358	-0.513299
N001	Nicotinamide	0.488922	0.0214143	0.0736491		-0.197764	-1.00355	-0.712921
A039	Argininosuccinate	0.100106	0.00840176	0.161168		-0.857656	-0.992021	-0.369905
P073	5-Oxoproline	0.842886	0.00384155	0.120554		0.0427265	-0.911028	-0.386621
G023	Guanidinoacetate	0.350993	0.00106161	0.319336		-0.271489	-0.8949	-0.298403
B047	Betaine	0.0030666	0.097411	0.138392		-0.539584	-0.852292	-0.361855
C041	Carnitine	0.000637554	0.218816	0.551306		-1.23276	-0.844726	-0.0773972
P053	Pyridoxine	0.0280575	0.0678756	0.639867		-0.501601	-0.798601	-0.0834957
A021	beta-Ala	0.000449406	0.00653027	0.0744143		-0.541852	-0.78919	-0.299089
G019	Glu	0.0416053	0.00937121	0.0547355		-0.134531	-0.719491	-0.365429
M076	3-Methylhistidine	0.204139	0.0378006	0.431301		-0.204104	-0.706179	0.127241
G008	Glutathione(ox)	0.886896	0.0135227	0.00635191		0.0373992	-0.701291	-0.986402
C019	Cystathionine	0.92937	0.0237246	0.14853		0.0189266	-0.686123	-0.0957609
P003	Pro	0.567128	0.00724654	0.960752		-0.0284551	-0.640559	-0.00594716
G069	Glycerophosphorylcholine	0.0020892	0.0968433	0.0417871		-0.867523	-0.611316	-0.392799
C008	Creatine	0.0141499	0.0182817	0.879242		-0.26533	-0.528999	0.0172647
A015	Ala	0.0571022	0.0114312	0.923303		0.109925	-0.491002	-0.0110646
A110	alpha-Aminoadipate	0.333092	0.0397864	0.0785552		0.0675516	-0.439215	-0.306718
G011	Gly	0.12987	0.0337564	0.233433		-0.0806685	-0.438303	-0.166427
C220	gamma-Butyrobetaine	0.00149037	0.214886	0.123481		-0.507719	-0.436546	0.247961
H004	Hydroxyproline	0.098624	0.0147209	0.830296		-0.11782	-0.354598	-0.0330083
M003	Met	0.165806	0.00270229	0.700388		0.286531	-0.337504	0.048701
H002	His	0.0915353	0.00970683	0.289486		0.424514	-0.312009	0.136042
G018	Gln	0.473556	0.00990899	0.28172		0.0595581	-0.310252	-0.136882
T002	Tyr	0.0791516	0.00130815	0.246625		0.39608	-0.297725	0.15913
V001	Val	0.0698687	0.0110819	0.534627		0.478361	-0.29466	0.0754625
I008	Ile	0.0588734	0.00731023	0.676012		0.491794	-0.294514	0.0463084
S002	Ser	0.7016	0.04626	0.20005		-0.0364638	-0.286801	-0.176454
T003	Trp	0.0879275	0.0275753	0.442669		0.4833	-0.263249	0.0920243
L003	Leu	0.0641433	0.024367	0.752559		0.510047	-0.259916	0.0392923
M063	1-Methylnicotinamide	0.0215682	0.0787038	0.779086		0.329368	-0.253836	-0.0400192
P002	Phe	0.0593417	0.00449173	0.180983		0.478775	-0.237352	0.177222
A016	Asn	0.0194308	0.315914	0.0787586		0.276265	-0.125373	0.249409
A143	o-Acetylcarnitine	0.458788	0.819551	0.0173137		-0.120855	-0.0462777	0.431848
H017	Hypotaurine	0.00221746	0.855313	0.485405		0.366666	-0.0187709	-0.0816153
O003	Ornithine	0.018943	0.311601	0.0654879		1.08129	0.20566	0.518875
C001	Choline	0.022764	0.0509614	0.240912		0.236974	0.244245	0.137
C012	Carnosine	0.00528475	0.152148	0.0508977		0.530221	0.256533	0.358765
A020	SAM+	0.000678694	0.177963	0.00362263		1.0646	0.293251	0.562423
G009	Glutathione(red)	0.0396271	0.0706882	0.0390958		0.698737	0.344038	0.450367
E009	Ethanolamine phosphate	0.110693	0.00563453	0.0794545		0.102229	0.659635	0.428279
